# Supplementary material for: Evolutionary rate covariation reveals shared functionality and coexpression of genes
Source: HighWire-hosted journal article supplement (doi:10.1101/gr.132647.111), 2012-01-27
Supplement: SupplementalTable1.docx [file SupplementalTable1.docx]

Supplemental Table 1

ERC within protein complexes.

| **Complex name1** | **N2** | **mean ERC** | **P-value3** |
| --- | --- | --- | --- |
| COMA complex/817 | 3 | 0.699 | 0.0006 |
| Ndc80 complex/31262 | 3 | 0.665 | 0.0006 |
| checkpoint clamp complex/30896 | 3 | 0.621 | 0.0021 |
| nucleoplasmic THO complex/446 | 4 | 0.614 | 0.0006 |
| THO complex part of transcription export complex/445 | 4 | 0.614 | 0.0007 |
| transcription factor TFIIF complex/5674 | 3 | 0.610 | 0.0012 |
| CCR4-NOT core complex/30015 | 9 | 0.602 | 0.0000 |
| PeBoW complex/70545 | 3 | 0.591 | 0.0036 |
| glutamyl-tRNA(Gln) amidotransferase complex/30956 | 3 | 0.590 | 0.0036 |
| signal peptidase complex/5787 | 3 | 0.573 | 0.0033 |
| nuclear origin of replication recognition complex/5664 | 6 | 0.572 | 0.0000 |
| DNA-directed RNA polymerase II, core complex/5665 | 10 | 0.551 | 0.0000 |
| mitochondrial proton-transporting ATP synthase, stator stalk/274 | 3 | 0.548 | 0.0057 |
| GID complex/34657 | 7 | 0.535 | 0.0000 |
| chromosome passenger complex/32133 | 3 | 0.534 | 0.0063 |
| CURI complex/32545 | 5 | 0.532 | 0.0003 |
| Smc5-Smc6 complex/30915 | 8 | 0.528 | 0.0000 |
| transcription factor TFIIIC complex/127 | 6 | 0.526 | 0.0000 |
| exocyst/145 | 8 | 0.511 | 0.0000 |
| HIR complex/417 | 4 | 0.493 | 0.0023 |
| AP-1 adaptor complex/30121 | 6 | 0.484 | 0.0002 |
| phosphatidylinositol 3-kinase complex I/34271 | 4 | 0.469 | 0.0071 |
| eukaryotic translation initiation factor 3 complex/5852 | 7 | 0.455 | 0.0001 |
| mitochondrial respiratory chain complex II/5749 | 5 | 0.451 | 0.0016 |
| protein kinase CK2 complex/5956 | 4 | 0.447 | 0.0044 |
| UTP-C complex/34456 | 6 | 0.445 | 0.0002 |
| TORC1 complex/31931 | 5 | 0.444 | 0.0019 |
| gamma-tubulin small complex, spindle pole body/928 | 3 | 0.444 | 0.0192 |
| transcription factor TFIIIB complex/126 | 3 | 0.441 | 0.0188 |
| Sec62/Sec63 complex/31207 | 4 | 0.434 | 0.0070 |
| luminal surveillance complex/34099 | 3 | 0.431 | 0.0245 |
| anaphase-promoting complex/5680 | 13 | 0.428 | 0.0000 |
| nuclear cohesin complex/798 | 5 | 0.426 | 0.0011 |
| NDC1 complex/70762 | 3 | 0.424 | 0.0245 |
| Cdc73/Paf1 complex/16593 | 7 | 0.424 | 0.0002 |
| GARP complex/938 | 4 | 0.421 | 0.0071 |
| eukaryotic translation initiation factor 4F complex/16281 | 4 | 0.416 | 0.0083 |
| nuclear mitotic cohesin complex/34990 | 4 | 0.415 | 0.0084 |
| CCR4-NOT complex/30014 | 11 | 0.415 | 0.0000 |
| ESCRT II complex/814 | 3 | 0.411 | 0.0284 |
| mitochondrial proton-transporting ATP synthase complex, coupling factor F(o)/276 | 8 | 0.409 | 0.0000 |
| DNA-directed RNA polymerase II, holoenzyme/16591 | 50 | 0.409 | 0.0000 |
| AP-2 adaptor complex/30122 | 3 | 0.398 | 0.0304 |
| transcription factor TFIID complex/5669 | 15 | 0.397 | 0.0000 |
| eukaryotic translation elongation factor 1 complex/5853 | 3 | 0.393 | 0.0346 |
| HOPS complex/30897 | 6 | 0.384 | 0.0017 |
| ISW1 complex/16587 | 4 | 0.376 | 0.0133 |
| mediator complex/16592 | 23 | 0.368 | 0.0000 |
| DNA replication factor A complex/5662 | 3 | 0.367 | 0.0454 |
| AMP-activated protein kinase complex/31588 | 4 | 0.367 | 0.0304 |
| Elongator holoenzyme complex/33588 | 6 | 0.366 | 0.0016 |
| oligosaccharyltransferase complex/8250 | 7 | 0.362 | 0.0004 |
| transcription export complex/346 | 7 | 0.360 | 0.0011 |
| translocon complex/5784 | 3 | 0.355 | 0.0471 |
| mitochondrial small ribosomal subunit/5763 | 31 | 0.354 | 0.0000 |
| holo TFIIH complex/5675 | 9 | 0.350 | 0.0001 |
| COPI vesicle coat/30126 | 8 | 0.348 | 0.0001 |
| transcription elongation factor complex/8023 | 19 | 0.344 | 0.0000 |
| PAS complex/70772 | 5 | 0.343 | 0.0071 |
| CORVET complex/33263 | 6 | 0.341 | 0.0026 |
| i-AAA complex/31942 | 3 | 0.337 | 0.0516 |
| MCM complex/42555 | 6 | 0.336 | 0.0035 |
| SCF ubiquitin ligase complex/19005 | 13 | 0.334 | 0.0000 |
| mitochondrial sorting and assembly machinery complex/1401 | 4 | 0.332 | 0.0225 |
| ESCRT III complex/815 | 4 | 0.332 | 0.0218 |
| core TFIIH complex/439 | 5 | 0.331 | 0.0100 |
| Pwp2p-containing subcomplex of 90S preribosome/34388 | 6 | 0.328 | 0.0036 |
| nucleotide-excision repair factor 1 complex/110 | 3 | 0.324 | 0.0661 |
| nuclear condensin complex/799 | 6 | 0.323 | 0.0031 |
| mitochondrial respiratory chain complex IV/5751 | 6 | 0.322 | 0.0040 |
| Mre11 complex/30870 | 3 | 0.322 | 0.0628 |
| signal recognition particle, endoplasmic reticulum targeting/5786 | 6 | 0.321 | 0.0040 |
| SLIK (SAGA-like) complex/46695 | 17 | 0.320 | 0.0000 |
| retromer complex/30904 | 5 | 0.317 | 0.0109 |
| proteasome regulatory particle, lid subcomplex/8541 | 10 | 0.312 | 0.0001 |
| phosphatidylinositol 3-kinase complex II/34272 | 4 | 0.307 | 0.0331 |
| Piccolo NuA4 histone acetyltransferase complex/32777 | 6 | 0.306 | 0.0068 |
| cohesin loading complex/32116 | 4 | 0.305 | 0.0322 |
| DASH complex/42729 | 8 | 0.300 | 0.0011 |
| monopolin complex/33551 | 4 | 0.298 | 0.0607 |
| retromer complex, inner shell/30906 | 3 | 0.296 | 0.0760 |
| SSL2-core TFIIH complex portion of holo TFIIH complex/443 | 6 | 0.296 | 0.0065 |
| SSL2-core TFIIH complex portion of NEF3 complex/442 | 6 | 0.296 | 0.0067 |
| 1,3-beta-glucan synthase complex/148 | 3 | 0.292 | 0.0858 |
| NuA3 histone acetyltransferase complex/33100 | 4 | 0.287 | 0.0385 |
| TRAPP complex/30008 | 10 | 0.287 | 0.0003 |
| SAGA complex/124 | 19 | 0.285 | 0.0000 |
| carboxy-terminal domain protein kinase complex/32806 | 8 | 0.281 | 0.0023 |
| SBF transcription complex/33309 | 3 | 0.281 | 0.0839 |
| mitochondrial ribosome/5761 | 71 | 0.279 | 0.0000 |
| chromatin accessibility complex/8623 | 4 | 0.278 | 0.0458 |
| transcription factor complex/5667 | 68 | 0.277 | 0.0000 |
| Ada2/Gcn5/Ada3 transcription activator complex/5671 | 5 | 0.276 | 0.0180 |
| kinesin complex/5871 | 5 | 0.267 | 0.0767 |
| proteasome regulatory particle, base subcomplex/8540 | 10 | 0.264 | 0.0009 |
| commitment complex/243 | 11 | 0.262 | 0.0005 |
| t-UTP complex/34455 | 7 | 0.261 | 0.0054 |
| AP-3 adaptor complex/30123 | 4 | 0.261 | 0.0550 |
| mitochondrial proton-transporting ATP synthase complex/5753 | 14 | 0.260 | 0.0001 |
| mitochondrial large ribosomal subunit/5762 | 37 | 0.258 | 0.0000 |
| signalosome/8180 | 5 | 0.255 | 0.0395 |
| proteasome regulatory particle/5838 | 23 | 0.254 | 0.0000 |
| U6 snRNP/5688 | 3 | 0.246 | 0.1155 |
| U1 snRNP/5685 | 15 | 0.245 | 0.0000 |
| mRNA cleavage factor complex/5849 | 19 | 0.243 | 0.0000 |
| Golgi transport complex/17119 | 8 | 0.237 | 0.0038 |
| RSC complex/16586 | 14 | 0.236 | 0.0000 |
| Mdm10/Mdm12/Mmm1 complex/32865 | 3 | 0.235 | 0.1224 |
| preribosome, small subunit precursor/30688 | 9 | 0.233 | 0.0026 |
| condensed nuclear chromosome kinetochore/778 | 37 | 0.230 | 0.0000 |
| pre-replicative complex/5656 | 15 | 0.226 | 0.0000 |
| nucleotide-excision repair factor 3 complex/112 | 8 | 0.224 | 0.0058 |
| prefoldin complex/16272 | 6 | 0.222 | 0.0207 |
| RES complex/70274 | 3 | 0.221 | 0.1389 |
| clathrin vesicle coat/30125 | 13 | 0.219 | 0.0004 |
| U2 snRNP/5686 | 10 | 0.216 | 0.0036 |
| GPI-anchor transamidase complex/42765 | 5 | 0.215 | 0.0424 |
| eukaryotic translation initiation factor 2B complex/5851 | 5 | 0.209 | 0.0483 |
| NuA4 histone acetyltransferase complex/35267 | 12 | 0.206 | 0.0008 |
| Atg1p signaling complex/34273 | 3 | 0.202 | 0.1497 |
| Ino80 complex/31011 | 11 | 0.201 | 0.0017 |
| Swr1 complex/812 | 13 | 0.201 | 0.0008 |
| chromatin silencing complex/5677 | 5 | 0.198 | 0.0537 |
| mRNA cleavage and polyadenylation specificity factor complex/5847 | 14 | 0.191 | 0.0007 |
| mitochondrial outer membrane translocase complex/5742 | 6 | 0.190 | 0.0460 |
| MBF transcription complex/30907 | 3 | 0.189 | 0.1712 |
| vesicle coat/30120 | 31 | 0.189 | 0.0000 |
| mitochondrial intermembrane space protein transporter complex/42719 | 4 | 0.188 | 0.1172 |
| kinetochore/776 | 48 | 0.187 | 0.0000 |
| TRAMP complex/31499 | 5 | 0.186 | 0.0873 |
| histone acetyltransferase complex/123 | 41 | 0.181 | 0.0000 |
| alpha-1,6-mannosyltransferase complex/136 | 6 | 0.181 | 0.0378 |
| mannosyltransferase complex/31501 | 6 | 0.181 | 0.0412 |
| small nuclear ribonucleoprotein complex/30532 | 47 | 0.180 | 0.0000 |
| mitochondrial inner membrane protein insertion complex/42721 | 3 | 0.178 | 0.1767 |
| DNA replication preinitiation complex/31261 | 20 | 0.175 | 0.0001 |
| Cul3-RING ubiquitin ligase complex/31463 | 5 | 0.173 | 0.0697 |
| COPII vesicle coat/30127 | 8 | 0.173 | 0.0198 |
| CCAAT-binding factor complex/16602 | 4 | 0.172 | 0.2311 |
| epsilon DNA polymerase complex/8622 | 5 | 0.171 | 0.0740 |
| guanyl-nucleotide exchange factor complex/32045 | 7 | 0.169 | 0.0262 |
| mitochondrial pyruvate dehydrogenase complex/5967 | 4 | 0.168 | 0.1278 |
| box C/D snoRNP complex/31428 | 5 | 0.166 | 0.0753 |
| U4/U6 x U5 tri-snRNP complex/46540 | 22 | 0.165 | 0.0000 |
| ribonuclease MRP complex/172 | 9 | 0.165 | 0.0166 |
| multi-eIF complex/43614 | 8 | 0.165 | 0.0215 |
| U5 snRNP/5682 | 13 | 0.163 | 0.0015 |
| Set3 complex/34967 | 6 | 0.162 | 0.0562 |
| Rpd3S complex/32221 | 4 | 0.161 | 0.1378 |
| tRNA-intron endonuclease complex/214 | 4 | 0.159 | 0.1369 |
| glycine cleavage complex/5960 | 4 | 0.156 | 0.1361 |
| small-subunit processome/32040 | 45 | 0.154 | 0.0000 |
| SNARE complex/31201 | 3 | 0.154 | 0.2045 |
| repairosome/108 | 4 | 0.150 | 0.1401 |
| proteasome storage granule/34515 | 21 | 0.148 | 0.0001 |
| eisosome/32126 | 3 | 0.145 | 0.2142 |
| Rpd3L complex/33698 | 12 | 0.141 | 0.0062 |
| Atg12-Atg5-Atg16 complex/34274 | 3 | 0.141 | 0.2249 |
| GET complex/43529 | 3 | 0.137 | 0.2245 |
| nuclear MIS12/MIND type complex/818 | 4 | 0.136 | 0.1643 |
| chromatin remodeling complex/16585 | 94 | 0.135 | 0.0000 |
| Set1C/COMPASS complex/48188 | 8 | 0.132 | 0.0388 |
| spliceosomal complex/5681 | 35 | 0.131 | 0.0000 |
| DNA-directed RNA polymerase III complex/5666 | 14 | 0.130 | 0.0056 |
| CBF3 complex/31518 | 4 | 0.124 | 0.2452 |
| protein phosphatase type 2A complex/159 | 6 | 0.119 | 0.1015 |
| alpha,alpha-trehalose-phosphate synthase complex (UDP-forming)/5946 | 3 | 0.117 | 0.2585 |
| mitochondrial oxoglutarate dehydrogenase complex/9353 | 3 | 0.116 | 0.2645 |
| stress granule/10494 | 14 | 0.116 | 0.0098 |
| nuclear telomere cap complex/783 | 6 | 0.113 | 0.1031 |
| septin complex/31105 | 4 | 0.113 | 0.1968 |
| proteasome complex/502 | 47 | 0.109 | 0.0000 |
| Rpd3L-Expanded complex/70210 | 17 | 0.109 | 0.0044 |
| cytosolic large ribosomal subunit/22625 | 83 | 0.108 | 0.0000 |
| proteasome core complex, alpha-subunit complex/19773 | 7 | 0.108 | 0.0870 |
| cytoplasmic exosome (RNase complex)/177 | 10 | 0.105 | 0.0429 |
| 90S preribosome/30686 | 82 | 0.104 | 0.0000 |
| Arp2/3 protein complex/5885 | 8 | 0.104 | 0.0691 |
| replication fork protection complex/31298 | 25 | 0.102 | 0.0009 |
| RAVE complex/43291 | 3 | 0.102 | 0.2804 |
| proteasome core complex, beta-subunit complex/19774 | 7 | 0.101 | 0.0947 |
| nucleolar ribonuclease P complex/5655 | 7 | 0.099 | 0.1248 |
| RENT complex/30869 | 4 | 0.095 | 0.2338 |
| SWI/SNF complex/16514 | 11 | 0.094 | 0.0464 |
| ASTRA complex/70209 | 7 | 0.092 | 0.1157 |
| preribosome/30684 | 129 | 0.091 | 0.0000 |
| nuclear pore/5643 | 44 | 0.089 | 0.0000 |
| cytosolic small ribosomal subunit/22627 | 52 | 0.089 | 0.0001 |
| nuclear nucleosome/788 | 11 | 0.089 | 0.0487 |
| preribosome, large subunit precursor/30687 | 40 | 0.087 | 0.0002 |
| ubiquitin ligase complex/151 | 48 | 0.086 | 0.0002 |
| cytosolic ribosome/22626 | 148 | 0.086 | 0.0000 |
| Hrd1p ubiquitin ligase ERAD-L complex/839 | 4 | 0.083 | 0.2533 |
| RNA polymerase I core factor complex/70860 | 4 | 0.083 | 0.2531 |
| chromatin assembly complex/5678 | 10 | 0.082 | 0.0721 |
| Sin3-type complex/70822 | 16 | 0.081 | 0.0202 |
| eukaryotic translation initiation factor 2 complex/5850 | 3 | 0.079 | 0.3135 |
| histone deacetylase complex/118 | 28 | 0.076 | 0.0023 |
| HDA1 complex/70823 | 3 | 0.076 | 0.3156 |
| cytoplasmic mRNA processing body/932 | 20 | 0.072 | 0.0141 |
| cyclin-dependent protein kinase holoenzyme complex/307 | 13 | 0.072 | 0.0565 |
| vacuolar proton-transporting V-type ATPase, V0 domain/220 | 6 | 0.072 | 0.1963 |
| mitochondrial respiratory chain complex III/5750 | 8 | 0.069 | 0.1406 |
| mitochondrial inner membrane presequence translocase complex/5744 | 10 | 0.069 | 0.1037 |
| methionyl glutamyl tRNA synthetase complex/17102 | 3 | 0.067 | 0.3394 |
| presequence translocase-associated import motor/1405 | 6 | 0.064 | 0.2022 |
| RecQ helicase-Topo III complex/31422 | 3 | 0.063 | 0.3487 |
| delta DNA polymerase complex/43625 | 3 | 0.062 | 0.3418 |
| proteasome core complex/5839 | 15 | 0.060 | 0.0643 |
| RNA polymerase I transcription factor complex/120 | 7 | 0.057 | 0.2368 |
| mitotic checkpoint complex/33597 | 3 | 0.054 | 0.3647 |
| TORC2 complex/31932 | 5 | 0.051 | 0.2803 |
| proton-transporting ATP synthase complex, catalytic core F(1)/45261 | 4 | 0.049 | 0.3234 |
| Mpp10 complex/34457 | 3 | 0.047 | 0.3755 |
| exosome (RNase complex)/178 | 16 | 0.040 | 0.1180 |
| nuclear exosome (RNase complex)/176 | 16 | 0.040 | 0.1209 |
| chaperonin-containing T-complex/5832 | 11 | 0.038 | 0.2080 |
| alpha DNA polymerase:primase complex/5658 | 7 | 0.034 | 0.2808 |
| GINS complex/811 | 4 | 0.031 | 0.3780 |
| GSE complex/34449 | 4 | 0.030 | 0.4282 |
| small nucleolar ribonucleoprotein complex/5732 | 22 | 0.029 | 0.1185 |
| transcription export complex 2/70390 | 4 | 0.027 | 0.3827 |
| ribosome/5840 | 295 | 0.025 | 0.0000 |
| polarisome/133 | 5 | 0.020 | 0.3794 |
| protein phosphatase type 1 complex/164 | 4 | 0.019 | 0.4103 |
| ribonucleoprotein complex/30529 | 532 | 0.015 | 0.0000 |
| ESCRT I complex/813 | 3 | 0.012 | 0.4492 |
| DNA replication factor C complex/5663 | 5 | 0.011 | 0.4150 |
| DNA-directed RNA polymerase I complex/5736 | 12 | 0.009 | 0.3785 |
| polysome/5844 | 18 | 0.008 | 0.3470 |
| CAF-1 complex/33186 | 3 | 0.002 | 0.4584 |
| vacuolar proton-transporting V-type ATPase, V1 domain/221 | 8 | -0.008 | 0.5046 |
| nucleotide-excision repair factor 4 complex/113 | 4 | -0.009 | 0.4827 |
| Elg1 RFC-like complex/31391 | 5 | -0.021 | 0.5324 |
| Ctf18 RFC-like complex/31390 | 7 | -0.046 | 0.7151 |
| Rad17 RFC-like complex/31389 | 5 | -0.054 | 0.6688 |
| Doa10p ubiquitin ligase complex/837 | 5 | -0.099 | 0.8399 |
| EKC/KEOPS protein complex/408 | 3 | -0.109 | 0.6962 |
| NatA complex/31415 | 3 | -0.123 | 0.7202 |
| exomer complex/34044 | 3 | -0.124 | 0.7027 |
| nucleotide-excision repair factor 2 complex/111 | 3 | -0.130 | 0.7383 |
| Cdc48p-Npl4p-Ufd1p AAA ATPase complex/34098 | 3 | -0.149 | 0.7765 |
| mRNA cap binding complex/5845 | 3 | -0.168 | 0.8109 |
| palmitoyltransferase complex/31211 | 3 | -0.235 | 0.8527 |

1 Complex name as annotated in the Saccharomyces Genome Browser (SGD).

2 Number of annotated protein components in the complex.

3 As determined by comparison of the observed mean correlation coefficient (r) to that of randomly drawn proteins.
